# Supplementary material for: Creating value with eHealth: identification of the value proposition with key stakeholders for the resilience navigator app
Source: PubMed Central journal article supplement (PMC7184708; doi:10.1186/s12911-020-1088-1), 2020-04-27
Supplement: 12911_2020_1088_MOESM2_ESM.pdf [file 12911_2020_1088_MOESM2_ESM.pdf]

## Additional file 2 – Topic list used during the semi-structured interviews.

**Table.** Topic list of the interviews.

| Topic                    | Question                                                                                                                                                                                                                                                                                                                                                                                                                                                                                                              |
|--------------------------|-----------------------------------------------------------------------------------------------------------------------------------------------------------------------------------------------------------------------------------------------------------------------------------------------------------------------------------------------------------------------------------------------------------------------------------------------------------------------------------------------------------------------|
| <b>Start</b>             | <p>Discuss (without recording) the informed consent form:</p> <ul style="list-style-type: none"> <li>- Purpose of research &amp; interview</li> <li>- Anonymous processing of data</li> <li>- Monitoring recording &amp; processing</li> <li>- If you do not want to give an answer then you are free to do so (also stop research)</li> <li>- If you have questions, you can ask them at any time</li> <li>- Do you have any questions so far?</li> </ul> <p>Start recording</p>                                     |
| <b>Stress definition</b> | <ol style="list-style-type: none"> <li>1. Could you describe what stress entails according to you?               <ol style="list-style-type: none"> <li>a. Symptoms / characteristics</li> </ol> </li> </ol>                                                                                                                                                                                                                                                                                                          |
| <b>Customer jobs</b>     | <ol style="list-style-type: none"> <li>1. From the situation of Miriam/Peter: in which way has stress an influence on:               <ol style="list-style-type: none"> <li>a. Working life</li> <li>b. Private life</li> </ol> </li> </ol>                                                                                                                                                                                                                                                                           |
|                          | <ol style="list-style-type: none"> <li>2. 2. What would Miriam / Peter need when it comes to reducing stress?</li> </ol>                                                                                                                                                                                                                                                                                                                                                                                              |
|                          | <ol style="list-style-type: none"> <li>3. Which problems would the reduction of stress solve for Miriam/Peter?               <ol style="list-style-type: none"> <li>a. Why is it a problem?</li> <li>b. In what situations?</li> </ol> </li> </ol>                                                                                                                                                                                                                                                                    |
| <b>Gains</b>             | <ol style="list-style-type: none"> <li>1. To what extent do you expect that such an application could help reduce stress?</li> </ol>                                                                                                                                                                                                                                                                                                                                                                                  |
|                          | <ol style="list-style-type: none"> <li>2. What could be the benefit of using such an application for Miriam / Peter?               <ol style="list-style-type: none"> <li>a. Functional: Could it make a positive contribution to the work? In what way / in which situations?</li> <li>b. Social: Could it make a positive social contribution? In what way / in which situations?</li> <li>c. Emotional: Could it make a positive emotional contribution? In what way / in which situations?</li> </ol> </li> </ol> |
|                          | <ol style="list-style-type: none"> <li>3. What are essential elements that the application should contain for Miriam / Peter to start using the app?</li> </ol>                                                                                                                                                                                                                                                                                                                                                       |
|                          | <ol style="list-style-type: none"> <li>4. How do you think the application should be designed so that it is appealing for Miriam / Peter to use the app?               <ol style="list-style-type: none"> <li>a. General</li> </ol> </li> </ol>                                                                                                                                                                                                                                                                       |

|              |                                                                                                                                                                                                                                                                                                                                                                                                                                                                                                                                                                                                                                                                                                                                               |
|--------------|-----------------------------------------------------------------------------------------------------------------------------------------------------------------------------------------------------------------------------------------------------------------------------------------------------------------------------------------------------------------------------------------------------------------------------------------------------------------------------------------------------------------------------------------------------------------------------------------------------------------------------------------------------------------------------------------------------------------------------------------------|
|              | <ul style="list-style-type: none"> <li>b. Portable sensor technology <ul style="list-style-type: none"> <li>- Validity of measurements</li> <li>- Manually entering data</li> <li>- Combine data of, for example, agenda, location, email behaviour, causes of stress</li> </ul> </li> <li>c. Coaching messages: <ul style="list-style-type: none"> <li>- Frequency</li> <li>- Time of the day</li> <li>- Appearance of the message</li> <li>- Rewards</li> <li>- Social support. With whom? Colleagues share experiences, etc.?</li> <li>- Goal setting</li> </ul> </li> <li>d. Coaching techniques: <ul style="list-style-type: none"> <li>- Relax exercises</li> <li>- Time management</li> <li>- Cognitive therapy</li> </ul> </li> </ul> |
|              | <p>5. What preconditions must the app meet so that Miriam / Peter would be satisfied with the app?</p> <ul style="list-style-type: none"> <li>- How should employees be guided before and during the use of the application?</li> <li>- How would you like to use the app during the day?</li> <li>- Privacy: Problems with data collection? Who may have access to the data?</li> </ul>                                                                                                                                                                                                                                                                                                                                                      |
| <b>Pains</b> | <p>1. What would be barriers for Miriam / Peter to start working on stress management via the app?</p> <ul style="list-style-type: none"> <li>a. Functional: Do you expect Miriam / Peter to start using the app? What infringement / influence does usages of the app have on their daily activities?</li> <li>b. Social: What if colleagues know that Miriam / Peter are using the app to reduce work stress?</li> <li>c. Emotional: Do you believe Miriam / Peter would enjoy working on stress management via the app?</li> </ul>                                                                                                                                                                                                         |
|              | <p>2. What could frustrate Miriam / Peter or experience as a nuisance when using such an application?</p> <ul style="list-style-type: none"> <li>a. General</li> <li>b. Portable sensor technology <ul style="list-style-type: none"> <li>- Validity of measurements</li> <li>- Manually entering data</li> <li>- Combine data of, for example, agenda, location, email behaviour, causes of stress</li> </ul> </li> </ul>                                                                                                                                                                                                                                                                                                                    |

|            |                                                                                                                                                                                                                                                                                                                                                                                                                                                                                                                                                                                                                                                                                           |
|------------|-------------------------------------------------------------------------------------------------------------------------------------------------------------------------------------------------------------------------------------------------------------------------------------------------------------------------------------------------------------------------------------------------------------------------------------------------------------------------------------------------------------------------------------------------------------------------------------------------------------------------------------------------------------------------------------------|
|            | <ul style="list-style-type: none"> <li>c. Coaching messages: <ul style="list-style-type: none"> <li>- Frequency</li> <li>- Time of the day</li> <li>- Appearance of the message</li> <li>- Rewards</li> <li>- Social support. With whom? Colleagues share experiences, etc.?</li> <li>- Goal setting</li> </ul> </li> <li>d. Coaching techniques: <ul style="list-style-type: none"> <li>- Relax exercises</li> <li>- Time management</li> <li>- Cognitive therapy</li> </ul> </li> </ul>                                                                                                                                                                                                 |
|            | <p>3. Could Miriam / Peter also experience disadvantages from using the application for the purpose of reducing stress in the workplace setting? What are the disadvantages?</p> <ul style="list-style-type: none"> <li>a. Functional: Are there negative consequences for Miriam / Peter by using the application during the work / job?</li> <li>b. Social: Could it contribute negatively in the social field? In what way / in which situations?</li> <li>c. Emotional: Could it contribute negatively on an emotional level? In what way / in which situations?</li> <li>d. Privacy: What is your view on the collection of personal data via portable sensor technology?</li> </ul> |
| <b>End</b> | <p>1. Would you use such an application for stress management yourself?<br/>Yes/No/Doubt</p>                                                                                                                                                                                                                                                                                                                                                                                                                                                                                                                                                                                              |
