# Supplementary material for: Creating value with eHealth: identification of the value proposition with key stakeholders for the resilience navigator app
Source: PubMed Central journal article supplement (PMC7184708; doi:10.1186/s12911-020-1088-1), 2020-04-27
Supplement: 12911_2020_1088_MOESM4_ESM.pdf [file 12911_2020_1088_MOESM4_ESM.pdf]

## Additional file 4 – Results of the online survey for the stakeholder identification.

**Table.** Results of the online survey

| Stakeholder                                       | Power            | Legitimacy       | Urgency          | None              | I don't know      | Nr. of attributes assigned |
|---------------------------------------------------|------------------|------------------|------------------|-------------------|-------------------|----------------------------|
| 1. Accountmanager                                 | 1 (5.9%)         | 0                | 0                | <b>10 (58.8%)</b> | <b>6 (35.3%)</b>  | 0                          |
| 2. Labour and organisation specialist             | 3 (17.7%)        | 4 (23.5%)        | 1 (5.9%)         | <b>7 (41.2%)</b>  | 3 (17.7%)         | 0                          |
| 3. Health and safety services                     | 2 (11.8%)        | 5 (29.4%)        | 3 (17.7%)        | 3 (17.7%)         | 4 (23.5%)         | 0                          |
| 4. Dutch Data Protection Authority                | 4 (23.5%)        | <b>9 (52.9%)</b> | 2 (11.8%)        | 3 (17.7%)         | 4 (23.5%)         | 1                          |
| 5. Company doctor                                 | 3 (17.7%)        | <b>6 (35.3%)</b> | <b>7 (41.2%)</b> | 3 (17.7%)         | 3 (17.7%)         | 2                          |
| 6. Business analyst/innovation expert             | 2 (11.8%)        | <b>7 (41.2%)</b> | 0                | 4 (23.5%)         | 4 (23.5%)         | 1                          |
| 7. Central Unions                                 | 5 (29.4%)        | 4 (23.5%)        | 3 (17.7%)        | 5 (29.4%)         | 3 (17.7%)         | 0                          |
| 8. Coronel institute for Labour and Health        | 0                | 3 (17.7%)        | 1 (5.9%)         | 4 (23.5%)         | <b>10 (58.8%)</b> | 0                          |
| 9. Data storage specialist                        | 3 (17.7%)        | 3 (17.7%)        | 3 (17.7%)        | <b>7 (41.2%)</b>  | 1 (5.9%)          | 0                          |
| 10. Aesthetics specialist                         | 3 (17.7%)        | 1 (5.9%)         | 0                | <b>7 (41.2%)</b>  | 6 (35.3%)         | 0                          |
| 11. eHealth specialist                            | 4 (23.5%)        | <b>7 (41.2%)</b> | 4 (23.5%)        | 2 (11.8%)         | 3 (17.7%)         | 1                          |
| 12. Health behaviour specialist                   | 3 (17.7%)        | 5 (29.4%)        | 2 (11.8%)        | 3 (17.7%)         | 5 (29.4%)         | 0                          |
| 13. Graphic designer                              | 4 (23.5%)        | 2 (11.8%)        | 1 (5.9%)         | <b>9 (52.9%)</b>  | 2 (11.8%)         | 0                          |
| 14. HR managers                                   | <b>9 (52.9%)</b> | 5 (29.4%)        | 4 (23.5%)        | 1 (5.9%)          | 4 (23.5%)         | 1                          |
| 15. Inspectorate of Social Affairs and Employment | 2 (11.8%)        | <b>7 (41.2%)</b> | 4 (23.5%)        | 3 (17.7%)         | 5 (29.4%)         | 1                          |
| 16. Labour lawyer                                 | 2 (11.8%)        | <b>7 (41.2%)</b> | 1 (5.9%)         | 3 (17.7%)         | 5 (29.4%)         | 1                          |
| 17. Lifestyle coach                               | 4 (23.5%)        | 2 (11.8%)        | 3 (17.7%)        | 5 (29.4%)         | 4 (23.5%)         | 0                          |

|                                                                                           |                             |                  |                            |                            |                            |          |
|-------------------------------------------------------------------------------------------|-----------------------------|------------------|----------------------------|----------------------------|----------------------------|----------|
| 18. Maintenance specialist (a specialist in maintaining the use of an eHealth technology) | 2<br>(11.8%)                | 5 (29.4%)        | 4<br>(23.5%)               | 3<br>(17.7%)               | 4<br>(23.5%)               | 0        |
| 19. Marketing department                                                                  | 2<br>(11.8%)                | 3 (17.7%)        | 1<br>(5.9%)                | 7<br>(41.2%)               | 4<br>(23.5%)               | 0        |
| 20. Participation council within organizations                                            | <b>8</b><br><b>(47.1%)</b>  | <b>7 (41.2%)</b> | 2<br>(11.8%)               | 1 (5.9%)                   | 2<br>(11.8%)               | 2        |
| 21. Research team                                                                         | 4<br>(23.5%)                | <b>6 (35.3%)</b> | <b>7</b><br><b>(41.2%)</b> | 1 (5.9%)                   | 4<br>(23.5%)               | 2        |
| 22. Organisations in eHealth design                                                       | 5<br>(29.4%)                | 3 (17.7%)        | 2<br>(11.8%)               | 4<br>(23.5%)               | 4<br>(23.5%)               | 0        |
| 23. Programmer/software developer                                                         | 3<br>(17.7%)                | 4 (23.5%)        | 4<br>(23.5%)               | <b>6</b><br><b>(35.3%)</b> | 2<br>(11.8%)               | 0        |
| 24. Product owner                                                                         | <b>8</b><br><b>(47.1%)</b>  | 3 (17.7%)        | 3<br>(17.7%)               | 3<br>(17.7%)               | 4<br>(23.5%)               | 1        |
| 25. Self-tracking device developer                                                        | 5<br>(29.4%)                | 3 (17.7%)        | 3<br>(17.7%)               | 4<br>(23.5%)               | 5<br>(29.4%)               | 0        |
| 26. Usability specialist                                                                  | 2<br>(11.8%)                | 2 (11.8%)        | 2<br>(11.8%)               | <b>6</b><br><b>(35.3%)</b> | <b>6</b><br><b>(35.3%)</b> | <b>0</b> |
| 27. Employers                                                                             | <b>10</b><br><b>(58.8%)</b> | <b>6 (35.3%)</b> | 5<br>(29.4%)               | 0                          | 3<br>(17.7%)               | 2        |
| 28. Employees                                                                             | 3<br>(17.7%)                | <b>7 (41.2%)</b> | <b>8</b><br><b>(47.1%)</b> | 3<br>(17.7%)               | 2<br>(11.8%)               | 2        |
| 29. Health insurer                                                                        | 5<br>(29.4%)                | <b>6 (35.3%)</b> | 3<br>(17.7%)               | 3<br>(17.7%)               | 2<br>(11.8%)               | 1        |
